# Supplementary material for: Study on the influence of TRX suspension training on the specific balance ability of surfers
Source: PeerJ. 2025 Oct 16;13:e20180. doi: 10.7717/peerj.20180 (PMC12535740; doi:10.7717/peerj.20180)
Supplement: Supplemental Information 1 [file peerj-13-20180-s001.xlsx]

## Sheet: Raw Data
Balance Board Lateral Squat
TRX						TB
Participants	Ⅰ	Ⅱ	Ⅲ	Ⅳ		Participants	Ⅰ	Ⅱ	Ⅲ	Ⅳ
1	22	29	37	46		17	24	29	33	39
2	25	32	38	46		18	34	39	42	48
3	31	37	41	48		19	28	33	38	40
4	32	40	44	49		20	25	30	36	40				Ⅰ	Ⅱ	Ⅲ	Ⅳ
5	31	41	52	59		21	30	37	40	45			TRX	29.0625	36.5625	44.3125	48.5625
6	28	33	40	48		22	35	39	44	48			TB	29.375	33.6875	38.1875	45.0625
7	30	42	46	53		23	33	37	43	47
8	27	29	38	45		24	24	30	35	44
9	22	27	35	40		25	28	32	34	42
10	34	41	50	60		26	26	29	35	41
11	30	36	41	48		27	35	38	42	48
12	29	38	42	48		28	33	35	39	42
13	24	33	40	49		29	22	27	32	39
14	36	42	46	55		30	30	34	38	44
15	34	44	47	55		31	34	37	41	50
16	30	41	49	53		32	29	33	39	42
mean value	29.0625	36.5625	42.875	50.125		mean value	29.375	33.6875	38.1875	43.6875
standard deviation	4.05384	5.24367	4.85895	5.1463		standard deviation	4.18143	3.7868	3.59198	3.49497
Growth rate = growth volume/starting volume*100%
The average increase of 7.5 or 25.8% for phase Ⅰ to Ⅱ, 7.75 or 21.2% for phase Ⅱ to Ⅲ, and 4.25 or 9.6% for phase Ⅲ to Ⅳ.						The average increase of 4.3 or 14.7% for stages I to II, 4.5 or 13.4% for stages II to III, and 6.9 or 18.0% for stages III to IV.
Before and after the experiment, the average increase was 19.5 with a growth rate of 67.1%						Before and after the experiment, the average increase was 19.5 with a growth rate of 67.1%
An independent samples t-test of the first test results for the TRX and TB groups gives F=0.156, p=0.696; the one-way ANOVA test gives p=0.837
